1 **Running head**

2 *A bird torpor spectrum*

3 **Title**

4 Facultative variation across a shallow to deep torpor spectrum in hummingbirds

5 **Authors**

6 A Shankar<sup>\*1,2,3</sup>, INH Cisneros<sup>4</sup>, S Thompson<sup>4</sup>, CH Graham<sup>1,2</sup>, DR Powers<sup>4</sup>

7 **Affiliations**

8 <sup>1</sup>Stony Brook University, Stony Brook, NY 11794, USA

9 <sup>2</sup>Swiss Federal Research Institute (WSL), Birmensdorf, CH-8903, Switzerland

10 <sup>3</sup>Current: Cornell University, Ithaca, NY 14850, USA

11 <sup>4</sup>George Fox University, Newberg, OR 97132, USA

12 \*nushiamme@gmail.com

13

## 14 **Abstract**

15           Many small endotherms use torpor, saving energy by a controlled reduction of their body  
16 temperature and metabolic rate. Some species (e.g. arctic ground squirrels, hummingbirds) enter  
17 deep torpor, dropping their body temperatures by 23-37 °C, while others can only enter shallow  
18 torpor (e.g., pigeons, 3-10 °C reductions). However, deep torpor in mammals can increase predation  
19 risk (unless animals are in burrows or caves), inhibit immune function, and result in sleep  
20 deprivation, so even for species that can enter deep torpor, facultative shallow torpor might help  
21 balance energy savings with these potential costs. Deep torpor occurs in three avian orders.  
22 Although the literature hints that some bird species can use both shallow and deep torpor, little  
23 empirical evidence of such an avian torpor spectrum exists. We infrared imaged three hummingbird  
24 species that are known to use deep torpor, under natural temperature and light cycles, to test if they  
25 were also capable of shallow torpor. All three species used both deep and shallow torpor, often on  
26 the same night. Depending on the species, they used shallow torpor for 5-35% of the night. The  
27 presence of a bird torpor spectrum indicates a capacity for fine-scale physiological and genetic  
28 regulation of avian torpid metabolism.

29 **Key words:** body temperature, torpor, metabolism, hypothermia, avian, mammals

## 30 Introduction

31 Torpor is an energy saving strategy documented in over 200 species of birds and mammals  
32 [1]. Torpid animals save energy by lowering their metabolic rate and body temperature as their  
33 environment gets colder. Much of the relatively recent work on the metabolic torpor spectrum has  
34 focused on mammals [1–3]. A flexible physiological continuum from shallow to deep torpor seems  
35 to exist in mammals, given energetic, neurological (EEG), transcriptomic, and ecological data, as  
36 found in several ground squirrel species, marmots, and kangaroo rats [4–11]. Some bird species  
37 are known to use shallow torpor at night, while others regularly use deep torpor [1]. Though avian  
38 shallow torpor and deep torpor have separately received research attention [12–16], the  
39 differences and potential trade-offs between these states in birds are poorly studied relative to  
40 mammals. There are some hints in the literature that such a torpor spectrum exists in birds under  
41 specific conditions [in mousebirds, 17]. Though birds constitute 65% of extant endotherms, the  
42 data on avian heterothermy are sparse compared to mammalian data [18,19], as are data on this  
43 avian torpor spectrum. Exploring the range, variability, and flexibility of avian torpor can help  
44 elucidate behavioural and physiological mechanisms underlying thermoregulation, energy  
45 regulation and torpor use across vertebrates, and move us closer to understanding the evolution  
46 of homeothermy vs. heterothermy.

47 Heterothermic animals are often described as having species-specific minimum torpid  
48 body temperatures [between -2 and 29.6 °C, 1,20–23]. Depending on their minimum torpid body  
49 temperatures, some birds only use a ‘shallow’ form of torpor (e.g. pigeons, body temperature 28 –  
50 36 °C; Figure 1c), while others use ‘deep’ torpor, in which body temperature is low (e.g.  
51 hummingbirds, 3 – 18 °C; Figure 1b). Of the 42 bird species reported to use daily torpor, only  
52 hummingbirds (*Trochilidae*), nightjars (*Caprimulgidae*), and one mousebird (*Coliidae*) species

53 have minimum body temperatures colder than 20 °C; the rest use a relatively shallow form of  
54 torpor [1].

55         Deep torpor likely reflects a trade-off between its benefits—an average of 60% energy  
56 savings relative to basal metabolic rates [24,25]—and potential costs such as susceptibility to  
57 predation, inability to rewarm, immune suppression, and sleep deprivation [3,26–30]. Given these  
58 trade-offs, it might be beneficial for birds that use the deepest possible form of torpor to  
59 sometimes use a shallower form, to allow moderate energy savings while minimizing some of the  
60 potential costs of deep torpor [31]. Yet in contrast to mammals, birds that are known to use deep  
61 torpor do not seem to use a shallower version of torpor by regulating their body temperatures  
62 above this minimum [1,5,15,20,32–34]. One mousebird species has been described to use both  
63 shallow and deep torpor when starved over several days, with their depth of torpor deepening as  
64 their energy stores were depleted [35,36]. However, mousebirds are thought to have diverged  
65 early in the avian phylogeny and their unusual combination (among birds) of low-quality plant  
66 diet with a relatively small body size makes them physiologically distinct in other ways. It is also  
67 possible that they display a form of ‘proto-torpor’ without the standard entry and rewarming  
68 patterns of other avian lineages [36–38]. The rarity of shallow torpor in birds that use deep  
69 torpor, and vice versa, would imply that shallow and deep torpor are mutually exclusive and  
70 relatively inflexible states. The possible existence of a torpor continuum has been hinted at in the  
71 literature [20], but evidence supporting or disproving its existence is scarce.

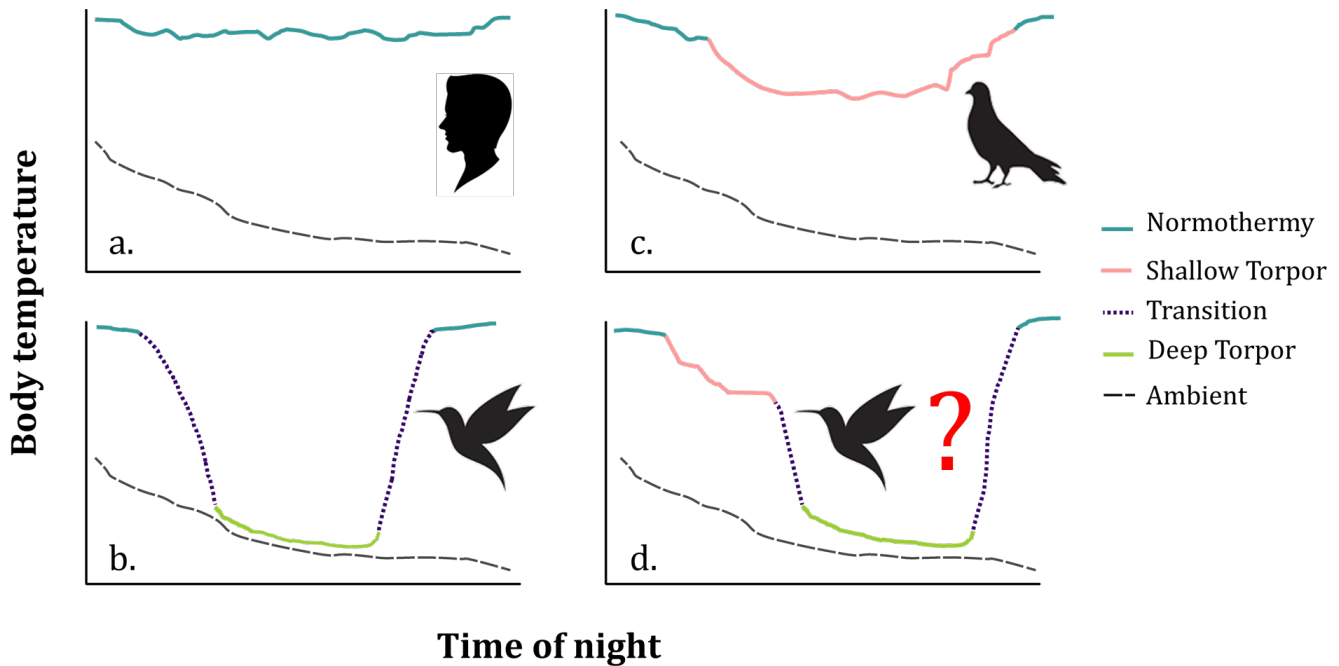

72

73 **Figure 1:** A schematic depiction of body temperature (coloured lines) relative to ambient  
74 temperature (black dashed line) at night, in sleep, shallow torpor, and deep torpor. a. A  
75 normothermic individual, with minimal circadian reductions in nighttime body temperature (e.g.  
76 humans). b. An individual starts the night normothermic, then transitions into deep torpor, where  
77 body temperature drops with ambient temperature, minimizing the difference between minimum  
78 body temperature and ambient temperature (e.g. hummingbirds). c. An individual starts the night  
79 normothermic, then transitions into 'shallow' torpor, potentially because the species has a very  
80 high minimum body temperature of only 4-5 °C below normothermic levels (e.g. some pigeon  
81 species). d. An individual uses a combination of normothermy, shallow, and deep torpor, at times  
82 regulating its body temperature above its minimum torpid body temperature – here we  
83 investigate the presence of such a torpor spectrum in hummingbirds.

84 Hummingbirds have long been known to use deep torpor to save energy overnight, with  
85 minimum body temperatures varying from 3-22 °C [21,25,39,40]. One past study reported a

86 shallower form of torpor in hummingbirds, but its experimental conditions may have prevented  
87 deep torpor: those birds were maintained at warm temperatures, were not free-living, and were  
88 frequently disturbed at night [41]. If hummingbirds can use both shallow and deep torpor, they  
89 are facultatively controlling their body temperature and metabolism over a broad range of torpid  
90 temperatures, despite much lower ambient temperatures. This flexibility in body temperatures is  
91 almost never described in birds, but such a capacity could contribute to hummingbirds' ability to  
92 thrive under diverse and variable environmental conditions, from deserts to tropical forests and  
93 from sea level to the high Andes, despite their small body size and extreme metabolic demands.  
94 Previous work suggested that some larger hummingbird species had more variable metabolic  
95 rates than smaller hummingbirds [24,39], and our preliminary data from sites in the high  
96 Ecuadorian Andes has also suggested that some hummingbird species there might be using a  
97 range of shallow and deep torpor (Shankar et al., unpub).

98         Here we test whether hummingbirds are capable of shallow torpor by recording nighttime  
99 surface temperatures in three species sympatric at sites in Arizona (USA) where nighttime  
100 temperatures are cold enough to allow deep torpor. We know from previous work that all three  
101 species use deep torpor [16,24]. We hypothesized that these hummingbirds might facultatively  
102 use shallow torpor to balance the energy savings and physiological costs of deep torpor.  
103 Hummingbirds appear to delay torpor until they have reached some minimum threshold of energy  
104 stores [16,25,42]. We therefore expected birds to use shallow torpor in one of two ways: either  
105 exclusively with normothermy (Figure 1c), or before entering deep torpor, as a strategy to delay  
106 the onset and potential costs of deep torpor (Figure 1d). Given that hummingbirds seem to reach a  
107 minimum energetic threshold before entering deep torpor [16], we expected that once a bird  
108 entered deep torpor, it would stay in deep torpor for the remainder of that night, and then rewarm

109 to normothermy before flying off, rather than using shallow torpor after deep torpor. We use  
110 thermal imaging to study hummingbird torpor under near-natural conditions. This study design  
111 allows us to assess torpor use under natural light and temperature cues, as well as near-natural  
112 energy stores. If hummingbirds can use shallow as well as deep torpor, it would imply that they  
113 are able to regulate their metabolism and body temperature dynamically and with great flexibility.  
114 Such physiological control in torpor would in turn imply that a broad and perhaps continuous  
115 avian metabolic torpor spectrum exists, much like in mammals.

## 116 **Methods**

### 117 *Study sites and species*

118 We studied males of three hummingbird species at the Southwestern Research Station  
119 (SWRS) in the Chiracahua mountains of Arizona (Lat: 31.9, Long: -109.2): the blue-throated  
120 mountain-gem (*Lampornis clemenciae*; 8.4g, n = 14), Rivoli's hummingbird (*Eugenes fulgens*; 7.6g,  
121 n =12) and the black-chinned hummingbird (*Archilocus alexandri*; 2.9g, n = 7). Two blue-throated  
122 mountain-gem individuals had some bill corrugation and were likely late-stage juveniles. Within  
123 this hummingbird community, both the black-chinned and Rivoli's hummingbirds are subordinate  
124 to blue-throated mountain-gems (i.e., with less exclusive access to floral resources) [16,43]. We  
125 collected data between June 10 – 19, 2017 and May 20 – June 7, 2018.

### 126 *Thermal imaging—nighttime surface temperatures*

127 We captured hummingbirds using modified Hall traps at hummingbird feeders [44] within  
128 1.5 hours before sunset, to allow them to store energy naturally through the day, but also  
129 acclimate to our experimental setup. Most birds were already banded (this is a long-term bird  
130 monitoring site), but un-banded birds were marked with a small dot of non-toxic paint on the

131 forehead. We recorded capture mass, allowed the birds to feed *ad libitum*, and weighed them again  
132 for mass after feeding. They were then placed outdoors (individually) in five-sided acrylic  
133 chambers (either 18x17x22 cm or 46x23x46 cm), exposed to natural light and temperatures. The  
134 front face of the chamber was covered by a clear plastic sheet to prevent the bird escaping. This  
135 sheet caused the thermal reading of the bird's surface temperatures to be up to 2 °C cooler than  
136 direct bird readings, so once the bird was observed to settle down, the plastic sheet was removed.  
137 We placed a wire grill at the base of the chamber to encourage birds to perch with their sagittal  
138 plane facing the camera, usually ensuring that recordings included a direct view of the bird's eye.  
139 Recordings without this view were excluded from analyses.

140 Bird eye surface temperatures seem to closely reflect internal physiological state (e.g. body  
141 condition), from recent work in blue tits [45]. Hummingbirds have low feather density around the  
142 eye, so skin eye temperature patterns should closely reflect the patterns of core body  
143 temperature, minimizing the confounding effects of feather insulation, unlike in larger animals for  
144 which skin and core temperatures might vary because of reduced peripheral blood flow in torpor  
145 [15,46–49]. The traditional rules of endotherm thermoneutrality and body temperature do not  
146 seem to apply in hummingbirds because of their small size and status as 'micro-endotherms'; they  
147 do not seem to maintain steady-state thermal equilibrium as a result [50]. . Powers et al. [51] used  
148 thermal imaging to measure heat dissipation areas in hovering hummingbirds during the day in  
149 three species. They found that across all three species, eye surface temperature remained  
150 relatively constant across a range of ambient temperatures, with an intercept of 32–33 °C [Figure  
151 2 in 51]. Although this is lower than core body temperature, it is consistent with what is observed  
152 in individuals from these same species that are clearly normothermic. This supports our  
153 measurements of 32 °C being a common resting normothermic body temperature. A recent study



154 of hummingbird body temperature in torpor across six species showed that many individuals  
155 maintained normothermy at body (cloacal) temperatures below 40 °C [39]. Additionally, there  
156 seems to be high concordance between eye surface temperatures and metabolic rates as measured  
157 in ruby-throated hummingbirds (Erich Eberts, unpub.).

158 We used a FLIR SC6701 infrared video camera (640 × 480 pixel resolution, sampling at  
159 300 Hz; accurate to 1 °C at measured temperatures) to record surface temperatures of  
160 hummingbirds. We assumed emissivity was 0.95 across all surfaces of the hummingbird [47,52].  
161 We monitored birds continuously through the night, and sampled surface temperatures by  
162 recording 10 seconds of 30Hz video approximately every 10 minutes, using ResearchIR (FLIR,  
163 Inc.). From one frame per recording, a region including the bird and a slight buffer to include  
164 ambient temperatures was marked as a region of interest and exported to csv files for analysis in  
165 R [v.3.5.1; 53]. From each exported region of interest, we extracted maximum surface temperature  
166 (in Celsius) and mean surface temperature of the bird, as well as minimum temperature (our  
167 proxy for ambient temperature). We verified that maximum surface temperatures corresponded  
168 with maximum eye surface temperatures, and validated outliers in temperature measurements to  
169 ensure that they were reliable measurements. We also exported entire single-frame images from  
170 selected recordings and used ImageJ (NIH) to construct 3D images to assess how surface  
171 temperatures changed over the entire surface of the bird.

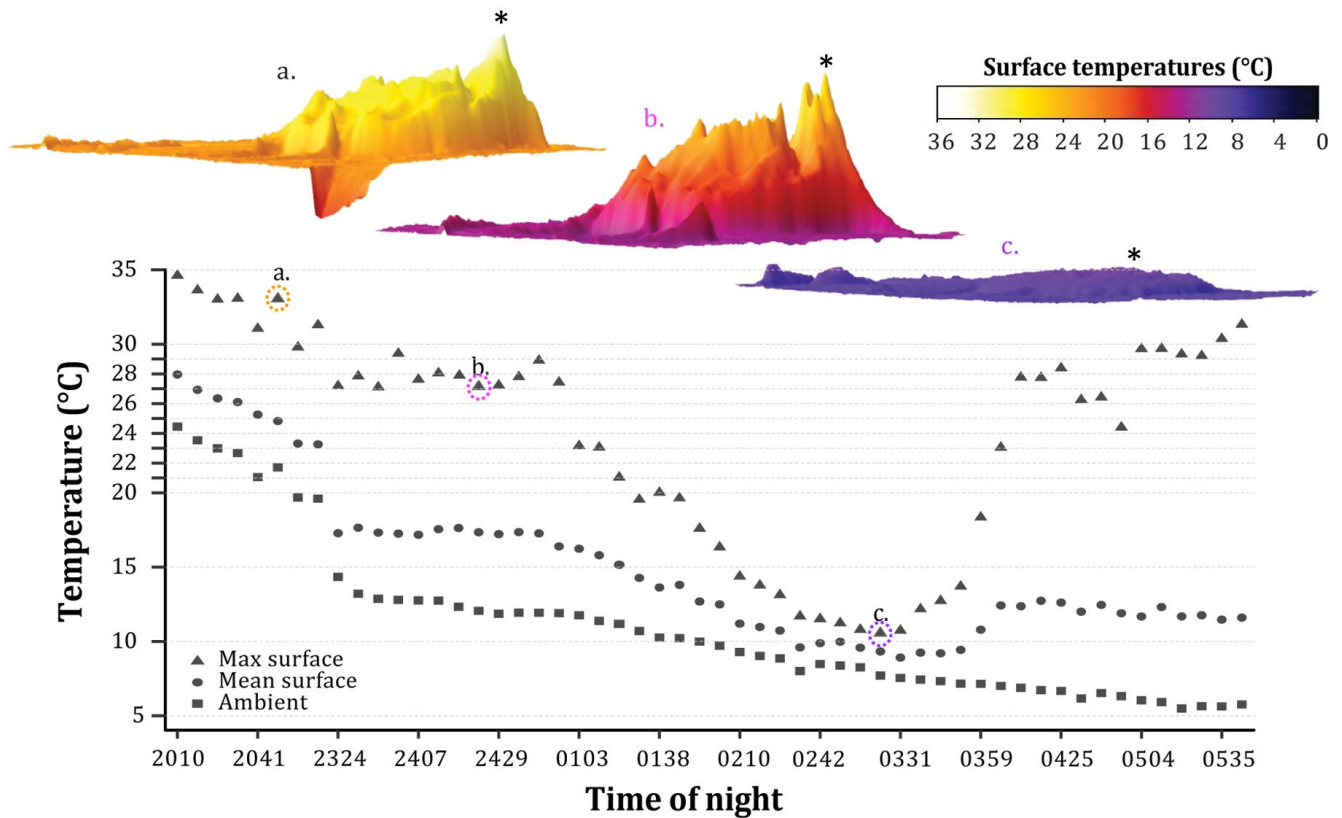

172

173 **Figure 2:** A Rivoli's hummingbird using all four metabolic states (normothermy, shallow torpor,  
174 transition and deep torpor). Top: 3D plots of the surface temperature of the bird in normothermy,  
175 shallow torpor, and deep torpor, aligned with the tail-beak axis along the x-axis. Asterisks indicate  
176 the location of the eye. See Supplementary Video SV1 for perspective on the 3D plots. a.  
177 Normothermic: surface temperatures peak at 35 °C near the eye; mean surface temperature is 25  
178 °C. b. Shallow: surface temperatures peak around the eye at 27 °C, followed by a drop in  
179 temperature and steady, much lower, surface temperatures over the rest of the body (17 °C), and  
180 then a steady drop towards the tail. c. Torpor: The entire surface of the bird is cold, peaking  
181 around the eye at 11 °C.

182 *Ambient temperature*

183 We used minimum temperatures from thermal image regions of interest as an estimate of  
184 ambient temperatures, verifying that these closely matched independent ambient temperature  
185 measurements from iButtons (Maxim Integrated DS1921) or thermocouples (Cu-Cn type-T,  
186 recorded on a TC-1000; Sable Systems). The FLIR camera was factory calibrated and verified by  
187 imaging a surface of a known temperature. Thermocouples and iButtons were calibrated by using  
188 a Percival (model I-35LV, Percival Scientific, Inc.) at controlled temperature steps, and checked  
189 against a thermometer traceable to the National Institute of Standards and Technology.

190 *Thermal categories*

191 We assigned bird surface temperature measurements at each time point to one of four  
192 categories: normothermy, shallow torpor, transition to and from deep torpor, or deep torpor. We  
193 defined these categories using individually assigned thresholds for each bird. We used eye surface  
194 temperatures of the bird once it had settled, but its eyes were still open, to define resting  
195 normothermic temperatures. Once the eyes were closed, we considered the bird asleep [54]. If eye  
196 surface temperatures dropped more than 2 °C below these resting temperatures, we classified the  
197 birds into one of the other three categories based on 1. rate of temperature change (stable, slow  
198 change, rapid change), and 2. magnitude of decrease of eye surface temperature below  
199 normothermic temperature, and above ambient temperature.

200 Birds were considered in shallow torpor if they dropped more than 2 °C but less than 20 °C  
201 below their resting temperature (but were still above ambient temperature), and maintained that  
202 temperature for more than 10 minutes (stable temperatures). Measurements were assigned to the  
203 transition category if they dropped or increased rapidly between normothermy and deep torpor,

204 or between shallow and deep torpor (i.e. transitions were defined by rapid, large temperature  
205 changes; average rate of change  $\pm$  s.e. of  $0.45 \pm 0.06$  °C/min, up to 3 °C/min; see Figure S2 for  
206 details). Birds were considered to be in deep torpor if eye surface temperature was close to  
207 ambient temperature, or if it was maintained below 20 °C without dropping any lower (stable, low  
208 temperatures), for an extended period [highest reported hummingbird torpid body temperature is  
209 22 °C, 21,55].

### 210 *Surface temperatures models*

211 Normothermy, shallow torpor and deep torpor could be distinguished by the relationship  
212 between surface (response) and ambient (predictor) temperature. While a normothermic  
213 homeotherm can maintain a relatively stable body or surface temperature over a large range of  
214 ambient temperatures, in deep torpor the body and surface temperatures become a positive  
215 function of ambient temperature. Therefore, we would expect deep torpor to have a steep slope  
216 and a very low intercept. If shallow torpor exists, then the slopes for normothermy and shallow  
217 torpor should be similar and low, while their intercepts should vary (shallow torpor lower than  
218 normothermy). Additionally, we expected species to use these torpor categories differently, and  
219 expected mass to negatively influence torpor use [birds with greater energy stores should use  
220 torpor less, 16].

221 To estimate regression equations of surface temperature as a function of ambient  
222 temperature for each of the four thermal categories (normothermy, shallow torpor, transition,  
223 deep torpor) we used linear mixed effects models [56] using the 'nlme' package in R [57]. A mixed  
224 effects model is appropriate because the response (surface) can be modelled as a function of  
225 various data types; in this case both continuous fixed effects (ambient temperature, thermal

226 categories, mass, species, and year), as well as random effects (categories nested within  
227 individuals) and an autocorrelation term were incorporated. To first test the effect of ambient  
228 temperature on surface temperature, we ran a simple linear model of surface temperature ( $T_s$ ) as  
229 a function of ambient temperature ( $T_a$ ). This model only explained 15% of the variation in surface  
230 temperatures, and we therefore ran an 'lme' linear mixed effects model of surface temperature as  
231 a function of ambient temperature. We included mass as a continuous fixed covariate; thermal  
232 category (normothermy, shallow torpor, etc.), species, and year as discrete fixed covariates, and  
233 categories within individuals as a random covariate. We included interaction terms between  
234 category and both ambient temperature and species. We also included an autocorrelation term  
235 ('CorAR1'; see Supplement 1 for model details):

$$236 \quad T_s \sim T_a * Category + Species * Category + Capture\ mass + Year + \left(1 \middle| \frac{Individual}{Category}\right) + CorAR1$$

237 *Frequency of thermal category use*

238 To estimate the proportion of time that each species spent in each of the four categories,  
239 we calculated the proportion of the night spent in each thermal category for every individual. We  
240 then modelled the percentage of the night spent in each category per species. We ran thermal  
241 category and species as interacting terms because we expected them to have interactive effects.

242 The model was:

$$243 \quad \textit{Category frequency} \sim \textit{Category} * \textit{Species}$$

244 We ran a generalized linear model, fitting a negative binomial distribution to the data [58].

245 We first ran Poisson and quasipoisson models, but both were overdispersed (see Supplement 1

246 and Table S1). We therefore fit a negative binomial which was much better fit than the others  
247 (Table S2). We used the 'glm.nb' function in the MASS package in R to run this model [53,58,59].

## 248 **Results**

### 249 *Ambient temperatures*

250 Ambient temperatures usually declined steadily over the course of the night (1930h and  
251 550h, e.g. in Figure 2). In 2017, temperatures were an average  $\pm$  s.d. of  $13 \pm 4.6$  °C (range 3 to 23  
252 °C), and in 2018 they were  $11 \pm 5.7$  °C (range -1 to 24 °C). Most nights ranged between 5 – 20 °C  
253 (mean 12 °C), except for one particularly cold night with ambient temperatures between -1 and 14  
254 °C (May 20, 2018), and one especially warm night (June 5, 2018) during which ambient  
255 temperatures ranged between 15 – 25 °C.

### 256 *Nighttime surface temperatures*

257 The surface temperatures of normothermic birds and birds in shallow torpor peaked near  
258 the eye and decreased from the eye towards the tail (Figures 2 and 3). Birds in deep torpor were  
259 evenly cold. Nighttime eye surface temperature varied overall between 5.9-38 °C (Supplement 2).  
260 Active birds at the beginning of the night had normothermic temperatures ranging between 31-38  
261 °C. This wide range included birds that were hovering and birds at rest. When they settled down,  
262 normothermic temperatures usually stabilized (when the bird was resting with eyes open) at 31  
263 °C, so we usually considered minimum normothermic resting surface temperatures to be around  
264 31 °C. In some cases, birds stabilized at 29 °C, at both the start and end of the night, with minimal  
265 fluctuation; in these cases we set the resting normothermic threshold to be 29 °C. Maximum eye  
266 surface temperatures ranged from 29-38 °C in normothermy, to 19.5–29 °C in shallow torpor, and  
267 5.9–24.1 °C in deep torpor. Categories varied slightly across individuals because we assigned

268 category thresholds per bird based on its surface temperature patterns relative to resting and  
269 ambient temperatures, and based on the rate of temperature change.

### 270 *Surface temperature model results*

271 The full model for surface temperature (where the slopes and intercepts vary by category  
272 and species) allowed us to identify and quantify the various thermal categories, including shallow  
273 torpor (Figure 3, Table S3 and Table S4). Mass did not seem to have a large effect surface  
274 temperature given the other factors, but year did.

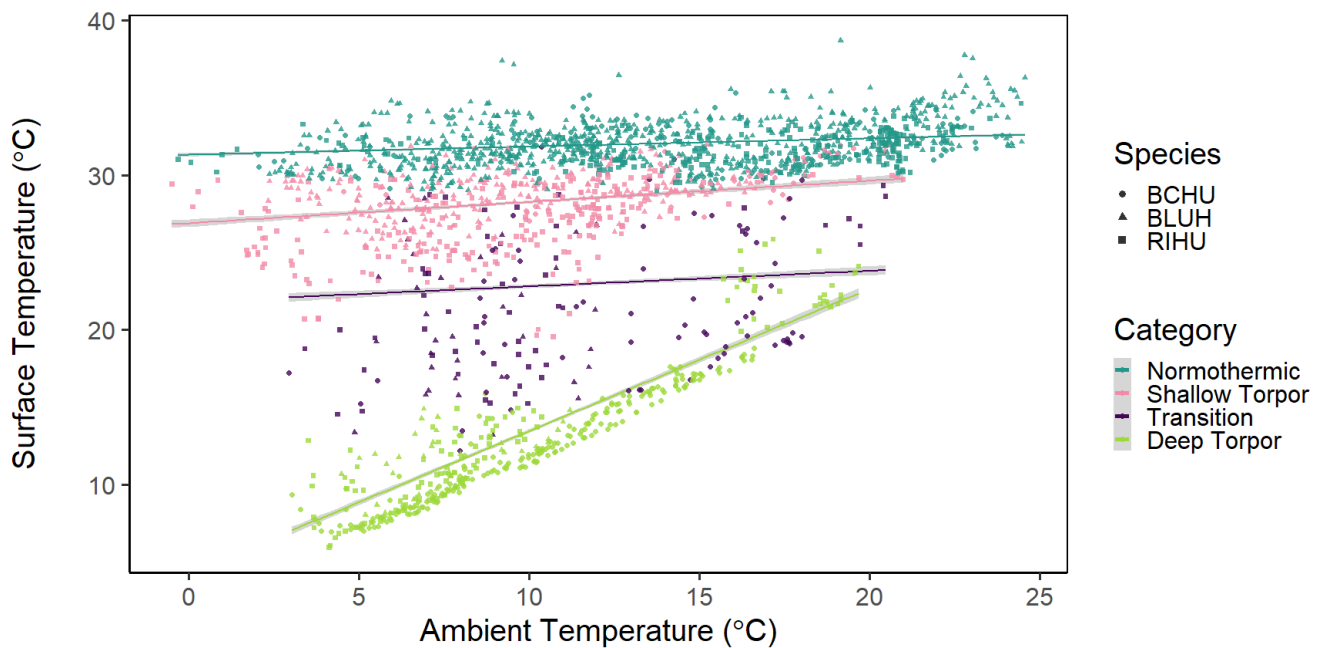

275

276 **Figure 3:** Predicted model fit from the linear mixed effects model of maximum surface  
277 temperatures (eye temperatures) as a function of ambient temperatures, coloured by category. As  
278 we predicted, deep torpor had a steep slope and low intercept, while shallow torpor and  
279 normothermy had similar low slopes and high intercepts (see Tables S3 and S4 for regression  
280 coefficients).

281           The normothermic and shallow torpor categories had similar, very low, slopes (0.11), while  
282 the normothermy intercept was about 4 °C higher than the shallow torpor intercept. A 4 °C drop  
283 from normothermy has previously been categorized as being a form of torpor [1]. In contrast with  
284 these thermoregulating states, hummingbirds largely thermoconform in deep torpor (down to the  
285 ambient temperatures we measured them at, which were all above their minimum body  
286 temperatures in deep torpor). In deep torpor, their surface temperatures closely tied to ambient  
287 temperature (slope of 0.85) and a low intercept about 20 °C lower than the normothermy intercept).  
288 The transition category is a non-equilibrial physiological state, with an intermediate intercept 17 °C  
289 lower than normothermy.



290 *Frequency of thermal category use*

291 Shallow torpor was used by all species, but at varying frequencies (Figure 4, Figure S1). Of  
292 the 33 individuals we studied, all 33 were normothermic for part of the night; 24 used shallow  
293 torpor for part of the night; 17 transitioned between deep torpor and normothermy, and 17 used  
294 deep torpor (Figure 4a).

295 All seven black-chinned hummingbirds (BCHU) used deep torpor, for an average of 49% of  
296 the night, while only three of these individuals used shallow torpor, for an average of 5% per  
297 night. BCHU spent 34% of the night on average in normothermy, and 12% in transition. The 14  
298 blue-throated mountain-gems (BLUH) remained largely normothermic (67% of the total  
299 nighttime), and used shallow torpor an average of 25% of the night, with four individuals  
300 remaining normothermic all night, 10 individuals using shallow torpor for at least some time and  
301 only four using deep torpor (4% of the night), with 3% of the night spent on transitioning on  
302 average. The 12 Rivoli's hummingbirds (RIHU) were the most variable in their use of the various  
303 metabolic states, with 10 individuals using shallow torpor (33% of total nighttime), six individuals  
304 using all four categories, four using normothermy and shallow torpor, one individual remaining  
305 normothermic all night, and one individual using all categories except shallow torpor. The RIHU  
306 individuals spent an average of 43% of the night in normothermy, 8% in transition, and 17% in  
307 deep torpor.

308 The model of thermal category frequency across species showed that there were overall  
309 clear differences in the thermal categories across all species. There were also species-specific  
310 differences in the use of normothermy, shallow torpor, deep torpor and the transition categories

311 (Figure 4b and Table S3). The model resulted in estimates that were more evenly distributed than  
312 the raw data (the two panels on Figure 4b), but the differences between species were still clear.

313         The two blue-throated mountain-gems that we studied on an especially warm night  
314 maintained high surface temperatures all night (33-35 °C). The two blue-throated mountain-gem  
315 individuals that could have been late-stage juveniles appeared to behave similarly to adults: one  
316 used all four categories, and the other used only normothermy and shallow torpor. Contrary to  
317 our expectations, several Rivoli's hummingbirds and a few blue-throated mountain-gems used  
318 shallow torpor for 1-2 hours after coming out of deep torpor, while the black-chinned  
319 hummingbirds never used shallow torpor after deep torpor.

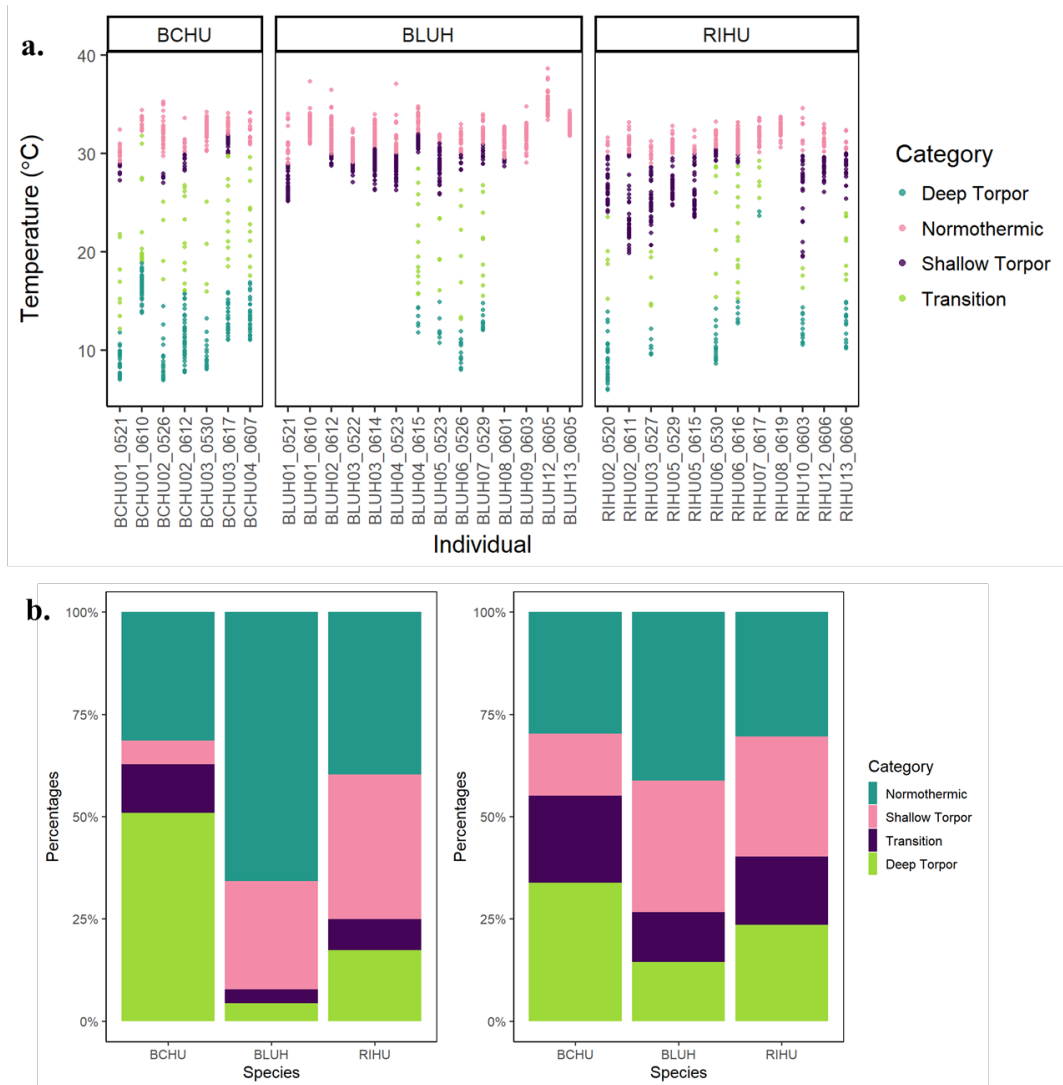

320

321 **Figure 4: a.** Distribution of values recorded per category (colours), per individual. BCHU = black-  
 322 chinned hummingbird; BLUH = blue-throated mountain-gem; RIHU = Rivoli's hummingbird. **b.**  
 323 The relative percentages of time a species spent over all nights studied (1900h-0559h) in each of  
 324 the four categories: normothermic, shallow torpor, transition, torpor. BCHU = black-chinned  
 325 hummingbird; BLUH = blue-throated mountain-gem; RIHU = Rivoli's hummingbird. Left:  
 326 Percentages calculated using raw data. Right: Model estimates from the glm model (Category  
 327 frequency ~ Category\*Species - 1), of the relative time per category per species, presented as  
 328 percentages.

## 329 Discussion

330 We describe and quantify the novel use of shallow torpor in birds that are known to use  
331 deep torpor. Similar to mammals, and in contrast with previous studies that either describe birds  
332 as using shallow torpor or deep torpor, hummingbirds appear capable of using both.  
333 Hummingbirds in shallow torpor appear to thermoregulate to maintain surface temperatures  
334 below normothermy. In contrast, hummingbirds in deep torpor largely thermoconform to ambient  
335 temperatures. The intermediate shallow state could serve to balance nighttime energy savings  
336 with the potential ecological and physiological costs of deep torpor. Reflecting what previous  
337 studies have found [16], birds with larger energy stores seem to have greater flexibility in  
338 avoiding deep torpor. The two larger species in our study used normothermy and shallow torpor  
339 for a greater proportion of the night than the smaller species. Our minimally invasive study design  
340 allowed us to thermally image hummingbirds under near-natural temperature cycles, without  
341 disturbing or touching the birds through the night, and allowed us to discover a new level of  
342 flexibility in hummingbirds' management of their nighttime energetic needs.

343 All three species used all metabolic categories, but unequally. Rivoli's hummingbirds used  
344 shallow torpor the most, followed by blue-throated mountain-gems. The small black-chinned  
345 hummingbirds used shallow torpor the least. It therefore appears that black-chinned  
346 hummingbirds, the smallest of the three study species, might have the least flexibility in managing  
347 their nighttime energy budget, while blue-throated mountain-gems, the large territorial species,  
348 have the most flexibility. Individuals of the two larger species appeared to have more flexibility in  
349 regulating their nighttime body temperature, commonly using shallow torpor or a combination of  
350 shallow and deep torpor. The more limited use of deep torpor in these two species is consistent  
351 with previous findings that these species tend to avoid deep torpor [16,24].

352 Our results support the argument that there must be either physiological or ecological  
353 costs of deep torpor [1], because hummingbirds that are clearly capable of using deep torpor  
354 sometimes use shallow torpor or avoid torpor altogether. Using shallow torpor rather than deep  
355 torpor could be especially beneficial in three scenarios. First, deep torpor in mammals (especially  
356 hibernation) is usually considered helpful in avoiding predation because torpid animals are less  
357 conspicuous to predators; but these animals are usually hidden in hibernacula or dens [1,60].  
358 Torpid birds in trees, in contrast, might be more conspicuous, making shallow torpor more  
359 efficient than deep torpor in allowing them to respond to potential predators [30]. Hummingbirds  
360 in shallow torpor could afford quicker rewarming times (< 5 minutes), and quicker responses to  
361 predators or other external stimuli, relative to deep torpor for which rewarming to normothermy  
362 takes an average of 20-30 minutes [24,61]. Second, at least in mammals, the physiological costs of  
363 torpor include rewarming costs, immune suppression [27,28], increased oxidative stress [62], and  
364 potential sleep deprivation [3,63]. There are hints that daily heterothermic mammals (Djungarian  
365 hamsters, *Phodopus sungorus*; 26g) enter a euthermic state after torpor to recover from sleep  
366 deprivation [26,63]. Shallow torpor would allow higher levels of metabolic function than deep  
367 torpor, perhaps facilitating some of the restorative functions of sleep, immunity, and lowered  
368 oxidative stress. Though avian sleep has been studied to some extent [13], little is known about  
369 the physiological basis for torpor vs. sleep in birds. Third, for nesting birds that need to keep their  
370 nest warm, shallow torpor could help balance the birds' need to maintain energy balance with the  
371 need to supply heat to their eggs or chicks. Nesting hummingbirds have been found to generally  
372 avoid torpor (with exceptions when energy stores seemed to be low); but the use of shallow  
373 torpor by nesting birds has not been evaluated [64–66]. If deep torpor had no ecological or  
374 physiological consequences, hummingbirds would likely maximize torpor use, or remain in deep

375 torpor for the duration of the night after entering torpor. Instead, some individuals used shallow  
376 torpor not just before a deep torpor bout as we predicted, but after emerging from a deep torpor  
377 bout, indicating that they may be trying to save energy but also balance these energy savings with  
378 the potential costs of deep torpor.

379         Here we identified four metabolic categories in hummingbirds: two thermoregulatory  
380 categories—normothermy and shallow torpor; a thermoconforming category—deep torpor; and  
381 the transition between deep torpor and the other categories. In normothermy and shallow torpor  
382 the animal actively thermoregulates to maintain a constant body temperature across a range of  
383 ambient temperatures. Based on the similar surface temperature slopes of normothermy and  
384 shallow torpor (Figure 3), and the rapid transitions between normothermy and shallow torpor  
385 that we often observed, these two states seem metabolically continuous in hummingbirds [67].  
386 Shallow torpor, as defined here, could potentially be a metabolically inhibited form of  
387 normothermic sleep, but it is unclear whether the shallow torpor and deep torpor we report are  
388 on a similar metabolic spectrum, and we were unable to definitely distinguish sleep using only  
389 body temperature measurements. Multiple lines of evidence, especially in ground squirrels and  
390 pocket mice, from electroencephalograms (EEGs), measurements of brain temperature, and  
391 metabolic rates indicate that mammals slow their metabolism continuously down from sleep into  
392 torpor, and regulate their body temperatures variably above minimum body temperature  
393 [1,5,11,31,68]. Thus, though sleep and torpor appear to be on a continuous spectrum in mammals,  
394 we are yet to confirm if they are on a continuum in birds.

395         Given that hummingbirds can regulate between shallow and deep torpor, the biological  
396 relevance of minimum body temperature measurements must be assessed. Recent work with

397 high-elevation Andean hummingbirds found that minimum torpid body temperature showed a  
398 phylogenetic signal, indicating that minimum torpid body temperature, at least at very cold sites,  
399 is evolutionarily conserved [39]. Shallow torpor can occur either because a bird's minimum  
400 possible torpid body temperature is relatively high (i.e., it does not have the capacity for deeper  
401 torpor), or when a bird regulates at a high, sub-normothermic, body temperature despite its  
402 minimum torpid body temperature being much lower (e.g. 15 °C, indicating that it is capable of  
403 deep torpor; Figure 1c). These two shallow torpor scenarios are indistinguishable (as in Figure 1c)  
404 unless the species' "true" minimum body temperature is known. If a bird regulates at a body  
405 temperature above its minimum, even though ambient temperatures were lower, these  
406 measurements might appear to be minimum body temperature measurements although they are  
407 not. In Rivoli's hummingbirds, for instance, we found that eye surface temperatures went as low as  
408 5.9 °C. However, Rivoli's individuals in the laboratory were previously reported to regulate their  
409 minimum body temperature at 12 °C despite ambient temperatures going lower [14]. Such a large  
410 disparity in birds in deep torpor is unlikely to be due to differences between core and skin  
411 temperatures, and could either indicate intra-specific differences in minimum body temperature,  
412 or that the birds in the previous study were using a shallower form of torpor. This disparity could  
413 also be caused by birds reducing their blood circulation around the eye during torpor, but such  
414 regional variation seems unlikely given the small size of hummingbirds and the even distribution  
415 of low surface temperatures we observed in torpid birds. Minimum body temperature may  
416 therefore be lower than has been reported in some species. Currently minimum body temperature  
417 across all hummingbirds is thought to vary from 3–22 °C [39,40,55]. But if some of the  
418 hummingbirds measured were using shallow rather than their deepest possible torpor, the range  
419 of hummingbirds' true minimum body temperatures would be narrower or lower. Additionally,

420 torpor studies in hummingbirds are often conducted in laboratory conditions, which could alter  
421 torpor responses [1,20].

422         We propose three reasons for why this form of shallow torpor in birds has so rarely been  
423 detected [35]. First, small drops in oxygen consumption or body temperature might have been  
424 overlooked. Second, most studies of bird torpor are either done under controlled laboratory  
425 conditions, or involve handling the birds many times at night to record body temperature. Birds in  
426 captivity are often overweight and have to be starved to enter torpor [69]. Laboratory torpor  
427 studies conducted at controlled temperature steps might have pre-empted the use of shallow  
428 torpor, because shallow torpor is presumably a fine-scale response to energetic state and  
429 environmental conditions, and controlled temperature steps or repeated handling might not elicit  
430 the same physiological responses as natural decreases in nighttime temperature would [70].  
431 Third, birds in laboratory settings are known to show altered torpor use relative to free birds:  
432 free-living animals often use torpor more frequently, and drop to a lower body temperature in  
433 torpor than laboratory animals [reviewed in 1,20,71]. Taken together, under relatively predictable  
434 natural temperature patterns, hummingbirds might be able to use intermediate torpor states  
435 more often, while in the laboratory, low temperatures, the factor most often tested, might cause  
436 the bird to either stay awake or drop into deep torpor if energetically necessary.

437         At the whole-animal level, the next step in understanding avian torpor would be to  
438 combine respirometry, thermal measurements and measurements of breathing or heart rates  
439 while keeping in mind the possible existence of shallow torpor. These measures have been found  
440 to sometimes be uncoupled in torpor [72,73], and therefore studying whether they vary together  
441 in shallow torpor would be the first step in identifying the physiological differences between  
442 sleep, shallow torpor and deep torpor. A promising future avenue for research would be to



443 investigate which metabolic and genetic pathways shut down at different temperatures in  
444 hummingbird torpor. It remains to be seen if other hummingbird and bird species that use deep  
445 torpor are also capable of shallower torpor, or if such control over their torpid metabolism is  
446 unique to these two hummingbird clades. Our data indicate that these hummingbird species in a  
447 temperate environment with cold ambient temperatures often use shallow torpor; it is therefore  
448 possible that tropical species at sites with high ambient temperatures might be doing the same.

#### 449 **Author contributions**

450 AS, DRP, CHG and INHC were involved in study conception, design and obtaining funding.  
451 AS, INHC, ST and DRP collected data; AS analysed the data and wrote the manuscript, CHG and  
452 DRP provided major comments and revisions.

#### 453 **Acknowledgements**

454 We thank Alexis Stark for help with data collection; Liliana M. Dávalos for discussions,  
455 statistical analyses, and comments on the manuscript; Benjamin Van Doren for help with  
456 statistical analyses; Erich Eberts and Elise Lauterbur for useful discussions; and Jeffrey Levinton  
457 for helpful comments on the manuscript. We thank our funders for their generous support: NASA  
458 (grant NNX11A028G to CHG, SJ Goetz, SM Wethington, and DRP), the Tinker Foundation, National  
459 Geographic Society (9506-14, AS), the American Philosophical Society (AS), ERC-2017-ADG  
460 number 787638 (CHG), the Swiss Federal Research Institute (WSL) for funding writing and  
461 analysis visits (AS, DRP), a George Fox University Richter Scholar grant (ST), and a George Fox  
462 University Faculty Development Grant (GFU2014G02, DRP). CHG thanks the Swiss National  
463 Science Foundation (SNF) - No 173342 and European Research Council (ERC) under the European  
464 Union's Horizon 2020 research and innovation program - No 787638. We would also like to thank all

465 the contributors to two crowd-funded experiment.com grants (<https://tinyurl.com/rknxz8u> and  
466 <https://tinyurl.com/vhbt4ke>). We have no conflicts of interests to declare.

### 467 **Data and Code accessibility**

468 The R scripts used to run the analyses are available on Github:

469 <https://github.com/nushiamme/TorporShallowDeep>. The data associated with this manuscript  
470 are available as supplementary data files.

### 471 **References**

- 472 1. Ruf T, Geiser F. 2015 Daily torpor and hibernation in birds and mammals. *Biol. Rev. Camb.*  
473 *Philos. Soc.* **90**, 891–926. (doi:10.1111/brv.12137)
- 474 2. van Breukelen F, Martin SL. 2015 The hibernation continuum: physiological and molecular  
475 aspects of metabolic plasticity in mammals. *Physiology* **30**, 273–281.  
476 (doi:10.1152/physiol.00010.2015)
- 477 3. Kräuchi K, Deboer T. 2011 Body temperatures, sleep, and hibernation. In *Principles and*  
478 *Practice of Sleep Medicine* (eds WC Dement, T Roth, MH Kryger), pp. 323–334. St. Louis,  
479 Missouri: Saunders. (doi:10.1016/B978-1-4160-6645-3.00158-4)
- 480 4. Heller HC, Walker JM, Florant GL, Glotzbach SF, Berger RJ. 1978 *Sleep and hibernation:*  
481 *electrophysiological and thermoregulatory homologies*. (doi:10.1016/B978-0-12-734550-  
482 5.50012-0)
- 483 5. Berger RJ. 1984 Slow wave sleep, shallow torpor and hibernation: Homologous states of  
484 diminished metabolism and body temperature. *Biol. Psychol.* **19**, 305–326.  
485 (doi:10.1016/0301-0511(84)90045-0)

- 486 6. Canale CI, Levesque DL, Lovegrove BG. 2012 Tropical heterothermy: does the exception prove  
487 the rule or force a re-definition? In *Living in a Seasonal World* (ed T. Ruf et al.), pp. 29–40.  
488 Berlin Heidelberg: Springer-Verlag. (doi:10.1007/978-3-642-28678-0\_3)
- 489 7. Heller HC. 1979 Hibernation: neural aspects. *Annu. Rev. Physiol.* **41**, 305–321.  
490 (doi:10.1146/annurev.ph.41.030179.001513)
- 491 8. Walker JM, Glotzbach SF, Berger RJ, Heller HC. 1977 Sleep and hibernation in ground squirrels  
492 (*Citellus* spp): electrophysiological observations. *Am. J. Physiol. Integr. Comp. Physiol.* **233**,  
493 R213–R221. (doi:10.1152/ajpregu.1977.233.5.R213)
- 494 9. Glotzbach SF, Heller HC. 1976 Central nervous regulation of body temperature during sleep.  
495 *Science (80-. )*. **194**, 537–539. (doi:10.1126/science.973138)
- 496 10. Florant GL, Heller HC. 1977 CNS regulation of body temperature in euthermic and hibernating  
497 marmots (*Marmota flaviventris*). *Am. J. Physiol. Integr. Comp. Physiol.* **232**, R203–R208.  
498 (doi:10.1152/ajpregu.1977.232.5.R203)
- 499 11. Walker JM, Garber A, Berger RJ, Heller HC. 1979 Sleep and estivation (shallow torpor):  
500 continuous processes of energy conservation. *Science (80-. )*. **204**, 1098–1100.  
501 (doi:10.1126/science.221974)
- 502 12. Roth TC, Rattenborg NC, Pravosudov V V. 2010 The ecological relevance of sleep: the trade-  
503 off between sleep, memory and energy conservation. *Philos. Trans. R. Soc. B Biol. Sci.* **365**,  
504 945–959. (doi:10.1098/rstb.2009.0209)
- 505 13. Beckers GJL, Rattenborg NC. 2015 An in depth view of avian sleep. *Neurosci. Biobehav. Rev.*  
506 **50**, 120–127. (doi:10.1016/j.neubiorev.2014.07.019)

- 507 14. Wolf LL, Hainsworth FR. 1972 Environmental influence on regulated body temperature in  
508 torpid hummingbirds. *Comp. Biochem. Physiol. Part A Physiol.* **41**, 167–173.  
509 (doi:10.1016/0300-9629(72)90044-8)
- 510 15. Brigham RM, Körtner G, Maddocks TA, Geiser F. 2000 Seasonal use of torpor by free-ranging  
511 Australian owlet-nightjars (*Aegotheles cristatus*). *Physiol. Biochem. Zool.* **73**, 613–620.  
512 (doi:10.1086/317755)
- 513 16. Powers DR, Brown AR, Van Hook JA. 2003 Influence of normal daytime fat deposition on  
514 laboratory measurements of torpor use in territorial versus nonterritorial hummingbirds.  
515 *Physiol. Biochem. Zool.* **76**, 389–97. (doi:10.1086/374286)
- 516 17. Schleucher E. 2004 Torpor in birds: taxonomy, energetics, and ecology. *Physiol. Biochem. Zool.*  
517 **77**, 942–949. (doi:10.1086/423744)
- 518 18. Geiser F, Ruf T. 1995 Hibernation versus daily torpor in mammals and birds: Physiological  
519 variables and classification of torpor patterns. *Physiol. Zool.* **68**, 935–966.  
520 (doi:10.1086/physzool.68.6.30163788)
- 521 19. McKechnie AE, Mzilikazi N. 2011 Heterothermy in afrotropical mammals and birds: A review.  
522 *Integr. Comp. Biol.* **51**, 349–363. (doi:10.1093/icb/icr035)
- 523 20. McKechnie AE, Lovegrove BG. 2002 Avian facultative hypothermic responses: A review.  
524 *Condor* **104**, 705–724. (doi:10.1650/0010-5422(2002)104[0705:AFHRAR]2.0.CO;2)
- 525 21. Hainsworth FR, Wolf LL. 1970 Regulation of oxygen consumption and body temperature  
526 during torpor in a hummingbird, *Eulampis jugularis*. *Science (80-. )*. **168**, 368–369.  
527 (doi:10.1126/science.168.3929.368)

- 528 22. Richter MM, Williams CT, Lee TN, Tøien Ø, Florant GL, Barnes BM, Buck CL. 2015 Thermogenic  
529 capacity at subzero temperatures: How low can a hibernator go? *Physiol. Biochem. Zool.* **88**,  
530 81–89. (doi:10.1086/679591)
- 531 23. Barnes BM. 1989 Freeze avoidance in a mammal: Body temperatures below 0°C in an arctic  
532 hibernator. *Science (80-. )*. **244**, 1593–1595. (doi:10.1126/science.2740905)
- 533 24. Shankar A, Schroeder RJ, Wethington SM, Graham CH, Powers DR. 2020 Hummingbird torpor  
534 in context: duration, more than temperature, is the key to nighttime energy savings. *J. Avian*  
535 *Biol.* **51**, jav.02305. (doi:10.1111/jav.02305)
- 536 25. Hainsworth FR, Collins BG, Wolf LL. 1977 The function of torpor in hummingbirds. *Physiol.*  
537 *Zool.* **50**, 215–222.
- 538 26. Deboer T, Tobler I. 2000 Slow waves in the sleep electroencephalogram after daily torpor are  
539 homeostatically regulated. *Neuroreport* **11**, 881–885. (doi:10.1097/00001756-200003200-  
540 00044)
- 541 27. Prendergast BJ, Freeman DA, Zucker I, Nelson RJ. 2002 Periodic arousal from hibernation is  
542 necessary for initiation of immune responses in ground squirrels. *Am. J. Physiol. Regul. Integr.*  
543 *Comp. Physiol.* **282**, R1054–R1062. (doi:10.1152/ajpregu.00562.2001.-Golden-man)
- 544 28. Bouma HR, Carey H V., Kroese FGM. 2010 Hibernation: the immune system at rest? *J. Leukoc.*  
545 *Biol.* **88**, 619–624. (doi:10.1189/jlb.0310174)
- 546 29. Palchykova S, Winsky-Sommerer R, Meerlo P, Dürr R, Tobler I. 2006 Sleep deprivation  
547 impairs object recognition in mice. *Neurobiol. Learn. Mem.* **85**, 263–271.  
548 (doi:10.1016/j.nlm.2005.11.005)

- 549 30. Carr JM, Lima SL. 2013 Nocturnal hypothermia impairs flight ability in birds: a cost of being  
550 cool. *Proc. R. Soc. B* **280**, 20131846. (doi:10.1098/rspb.2013.1846)
- 551 31. Boyles JG, Thompson AB, McKechnie AE, Malan E, Humphries MM, Careau V. 2013 A global  
552 heterothermic continuum in mammals. *Glob. Ecol. Biogeogr.* **22**, 1029–1039.  
553 (doi:10.1111/geb.12077)
- 554 32. Kruger K, Prinzinger R, Schuchmann K-L. 1982 Torpor and metabolism in hummingbirds.  
555 *Comp. Biochem. Physiol. Part A Mol. Integr. Physiol.* **73A**, 679–689.
- 556 33. Hiebert SM. 1990 Energy costs and temporal organization of torpor in the rufous  
557 hummingbird (*Selasphorus rufus*). *Physiol. Zool.* **63**, 1082–1097.
- 558 34. Hainsworth FR, Wolf LL. 1978 Regulation of metabolism during torpor in ‘temperate’ zone  
559 hummingbirds. *Auk* **95**, 197–199.
- 560 35. Prinzinger R, Schleucher E, Preßmar A. 1992 Langzeittelemetrie der körpertemperatur mit  
561 synchroner bestimmung des energiestoffwechsels beim blaunackenmausvogel (*Urocolius*  
562 *macrourus*) unter normal- und lethargiebedingungen (Torpor). *J. für Ornithol.* **133**, 446–450.  
563 (doi:10.1007/BF01640473)
- 564 36. McKechnie AE, Lovegrove BG. 2000 Heterothermy in mousebirds: evidence of avian proto-  
565 torpor? In *Life in the Cold*, pp. 49–56. Springer Berlin Heidelberg. (doi:10.1007/978-3-662-  
566 04162-8\_5)
- 567 37. Bosque C, Bosque CD, Lloyd P. 2017 Diet and time-activity budget of white-backed  
568 mousebirds *Colius colius* in south-western South Africa. *Ostrich* **88**, 247–252.  
569 (doi:10.2989/00306525.2017.1294629)

- 570 38. Downs CT, Wirminghaus JO, Lawes MJ. 2000 Anatomical and nutritional adaptations of the  
571 speckled mousebird (*Colius striatus*). *Auk* **117**, 791–794. (doi:10.1642/0004-  
572 8038(2000)117)
- 573 39. Wolf BO, McKechnie AE, Schmitt CJ, Czenze ZJ, Johnson AB, Witt CC. 2020 Extreme and  
574 variable torpor among high-elevation Andean hummingbird species. *Biol. Lett.* **16**, 20200428.  
575 (doi:10.1098/rsbl.2020.0428)
- 576 40. Carpenter FL. 1974 Torpor in an Andean hummingbird: its ecological significance. *Science*  
577 (80-). **183**, 545–547.
- 578 41. Morrison P. 1962 Modification of body temperature by activity in Brazilian hummingbirds.  
579 *Condor* **64**, 315–323.
- 580 42. Hiebert SM. 1992 Time-dependent thresholds for torpor initiation in the rufous hummingbird  
581 (*Selasphorus rufus*). *J. Comp. Physiol. B* **162**, 249–255.
- 582 43. Sandlin EA. 2000 Foraging information affects the nature of competitive interactions. *Oikos*  
583 **91**, 18–28. (doi:10.1034/j.1600-0706.2000.910102.x)
- 584 44. Russell SM, Russell RO. 2001 The North American banders' manual for banding  
585 hummingbirds. *North Am. Band. Counc.*
- 586 45. Jerem P, Jenni-Eiermann S, Herborn K, McKeegan D, McCafferty DJ, Nager RG. 2018 Eye region  
587 surface temperature reflects both energy reserves and circulating glucocorticoids in a wild  
588 bird. *Sci. Rep.* **8**, 1907. (doi:10.1038/s41598-018-20240-4)
- 589 46. Arnold W, Ruf T, Frey-Roos F, Bruns U. 2011 Diet-independent remodeling of cellular  
590 membranes precedes seasonally changing body temperature in a hibernator. *PLoS One* **6**,

- 591 e18641. (doi:10.1371/journal.pone.0018641)
- 592 47. Powers DR, Tobalske BW, Wilson JK, Woods HA, Corder KR. 2015 Heat dissipation during  
593 hovering and forward flight in hummingbirds. *R. Soc. Open Sci.* **2**, 150598.  
594 (doi:<http://dx.doi.org/10.1098/rsos.150598>)
- 595 48. Dausmann KH. 2005 Measuring body temperature in the field - Evaluation of external vs.  
596 implanted transmitters in a small mammal. *J. Therm. Biol.* **30**, 195–202.  
597 (doi:10.1016/j.jtherbio.2004.11.003)
- 598 49. Barclay RMR, Kalcounis MC, Crampton LH, Stefan C, Vonhof MJ, Wilkinson L, Brigham RM.  
599 1996 Can external radiotransmitters be used to assess body temperature and torpor in bats?  
600 *J. Mammal.* **77**, 1102–1106. (doi:10.2307/1382791)
- 601 50. Chaui-Berlinck JG, Bicudo JEP., Monteiro LHA, Navas CA. 2002 Oscillatory pattern in oxygen  
602 consumption of hummingbirds. *J. Therm. Biol.* **27**, 371–379. (doi:10.1016/S0306-  
603 4565(02)00005-0)
- 604 51. Powers DR, Langland KM, Wethington SM, Powers SD, Graham CH, Tobalske BW. 2017  
605 Hovering in the heat: effects of environmental temperature on heat regulation in foraging  
606 hummingbirds. *R. Soc. Open Sci.* **4**, 171056. (doi:10.1098/rsos.171056)
- 607 52. Cossins AR, Bowler K. 1987 *Temperature Biology of Animals*. Dordrecht: Springer  
608 Netherlands. (doi:10.1007/978-94-009-3127-5)
- 609 53. R Core Team. 2018 R: A language and environment for statistical computing.
- 610 54. Mascetti, Gian Gastone GG. 2016 Unihemispheric sleep and asymmetrical sleep: behavioral,  
611 neurophysiological, and functional perspectives. *Nat. Sci. Sleep* **Volume 8**, 221–238.



612 (doi:10.2147/NSS.S71970)

613 55. Bech C, Abe AS, Steffensen JF, Berger M, Bicudo JEPW. 1997 Torpor in three species of  
614 Brazilian hummingbirds under semi-natural conditions. *Condor* **99**, 780–788.

615 56. Gelman A, Hill J. 2006 *Data analysis using regression and multilevel/hierarchical models*. First.  
616 Cambridge: Cambridge University Press. (doi:10.1017/CBO9780511790942)

617 57. Bates D, Mächler M, Bolker BM, Walker SC. 2015 Fitting linear mixed-effects models using  
618 lme4. *J. Stat. Softw.* **67**, 251–264. (doi:10.18637/jss.v067.i01)

619 58. Venables WN, Ripley BD. 2002 *Modern Applied Statistics with S*. Fourth Edi. New York:  
620 Springer.

621 59. Venables WN, Dichmont CM. 2004 GLMs, GAMs and GLMMs: an overview of theory for  
622 applications in fisheries research. *Fish. Res.* **70**, 319–337. (doi:10.1016/j.fishres.2004.08.011)

623 60. Turbill C, Bieber C, Ruf T. 2011 Hibernation is associated with increased survival and the  
624 evolution of slow life histories among mammals. *Proc. R. Soc. B* **278**, 3355–3363.  
625 (doi:10.1098/rspb.2011.0190)

626 61. Bucher TL, Chappell MA. 1992 Ventilatory and metabolic dynamics during entry into and  
627 arousal from torpor in *Selasphorus* hummingbirds. *Physiol. Zool.* **65**, 978–993.  
628 (doi:10.2307/30158553)

629 62. Buzadžić B, Blagojević D, Korać B, Saičić Z., Spasić M., Petrović V. 1997 Seasonal variation in  
630 the antioxidant defense system of the brain of the ground squirrel (*Citellus citellus*) and  
631 response to low temperature compared with rat. *Comp. Biochem. Physiol. Part C Pharmacol.*  
632 *Toxicol. Endocrinol.* **117**, 141–149. (doi:10.1016/S0742-8413(97)00061-3)

- 633 63. Palchykova S, Deboer T, Tobler I. 2002 Selective sleep deprivation after daily torpor in the  
634 Djungarian hamster. *J. Sleep Res.* **11**, 313–319. (doi:10.1046/j.1365-2869.2002.00310.x)
- 635 64. Howell TR, Dawson WR. 1954 Nest temperatures and attentiveness in the Anna  
636 hummingbird. *Condor* **56**, 93–97.
- 637 65. Smith WK, Roberts SW, Miller PC. 1974 Calculating the nocturnal energy expenditure of an  
638 incubating Anna’s hummingbird. *Condor* **76**, 176–183.
- 639 66. Calder WA. 1971 Temperature relationships and nesting of the Calliope hummingbird.  
640 *Condor* **73**, 314–321.
- 641 67. Walker LE, Walker JM, Palca JW, Berger RJ. 1983 A continuum of sleep and shallow torpor in  
642 fasting doves. *Science (80-. )*. **221**, 194–195. (doi:10.1126/science.221.4606.194)
- 643 68. Boyles JG, McKechnie AE. 2010 Energy conservation in hibernating endotherms: Why  
644 “suboptimal” temperatures are optimal. *Ecol. Modell.* **221**, 1644–1647.  
645 (doi:10.1016/j.ecolmodel.2010.03.018)
- 646 69. Schleucher E, Prinzinger R. 2006 Heterothermia and torpor in birds: highly specialized  
647 physiological ability or just deep ‘nocturnal hypothermia’? — The limitations of terminology.  
648 In *Acta Zoologica Sinica*, pp. 393–396.
- 649 70. Geiser F, Holloway JC, Kortner G, Maddocks TA, Turbill C, Brigham RM. 2000 Do patterns of  
650 torpor differ between free- ranging and captive mammals and birds? In *Life in the Cold:*  
651 *Eleventh International Hibernation Symposium* (eds G Heldmaier, M Klingenspor), pp. 95–102.  
652 Berlin: Springer Berlin Heidelberg.
- 653 71. McNab BK. 1989 Laboratory and field studies of the energy expenditure of endotherms : A

- 654 comparison. *Trends Ecol. Evol.* **4**, 111–112.
- 655 72. O’Mara MT, Rikker S, Wikelski M, Maat A Ter, Pollock HS, Dechmann DKN. 2018 Heart rate  
656 reveals torpor at high body temperatures in lowland tropical free-tailed bats. *R. Soc. Open Sci.*  
657 **4**, 171359. (doi:10.1098/rsos.171359)
- 658 73. Toien O, Blake J, Edgar DM, Grahn DA, Heller HC, Barnes BM. 2011 Hibernation in black bears:  
659 Independence of metabolic suppression from body temperature. *Science (80-. ).* **331**, 906–  
660 909. (doi:10.1126/science.1199435)
- 661
